# Supplementary material for: Impact of quality improvement strategies on the quality of life and well-being of individuals with spinal cord injury: a systematic review protocol
Source: PubMed Central journal article supplement (PMC3599324; doi:10.1186/2046-4053-2-14), 2013-02-22
Supplement: 2046-4053-2-14-S1.pdf [file 2046-4053-2-14-S1.pdf]

Database: Ovid MEDLINE(R) <1946 to July Week 2 2012>, Ovid MEDLINE(R) In-Process & Other Non-Indexed Citations <July 23, 2012>

Search Strategy:

- 
- 1 "Continuity of Patient Care"/ [ QI strategies ]
  - 2 Case Management/
  - 3 Disease Management/
  - 4 "Delivery of Health Care, Integrated"/
  - 5 Progressive Patient Care/
  - 6 "Patient-Centered Care"/
  - 7 "Patient Care Planning"/
  - 8 (case adj coordination).tw.
  - 9 (case adj co-ordination).tw.
  - 10 (case adj management).tw.
  - 11 (care adj management).tw.
  - 12 (coordinat\$ adj1 care).tw.
  - 13 (co-ordinat\$ adj1 care).tw.
  - 14 (continu\$ adj1 care).tw.
  - 15 "continuity of care".tw.
  - 16 comanag\$.tw.
  - 17 co-manag\$.tw.
  - 18 (care adj3 aftercare).tw.
  - 19 (care adj3 after-care).tw.
  - 20 (care adj3 collaborat\$).tw.
  - 21 (care adj3 cooperat\$).tw.
  - 22 (care adj3 co-operat\$).tw.
  - 23 (care adj3 interinstitution\$).tw.
  - 24 (care adj3 inter-institution\$).tw.
  - 25 (care adj3 progressive).tw.
  - 26 (care adj3 shared).tw.
  - 27 (care adj3 transition\$).tw.
  - 28 (disease adj management).tw.
  - 29 (disconnect\$ adj2 care).tw.
  - 30 "discontinuity of care".tw.
  - 31 discoordinat\$.tw.
  - 32 disco-ordinat\$.tw.
  - 33 (fragment\$ adj care).tw.

34 (gap? adj2 care).tw.  
35 handover\$.tw.  
36 (hand adj over\$).tw.  
37 (harmon\$ adj care).tw.  
38 (integrat\$ adj2 care).tw.  
39 (lia?son adj service?).tw.  
40 "patient care plan\$".tw.  
41 ("patient centred" adj2 care).tw.  
42 ("patient centered" adj2 care).tw.  
43 (shared adj care).tw.  
44 (seamless adj care).tw.  
45 (synchron\$ adj2 care).tw.  
46 (transition\$ adj care).tw.  
47 (uncoordinat\$ adj care).tw.  
48 (unco-ordinat\$ adj care).tw.  
49 Medical Records Systems, Computerized/ [ clinical information systems ]  
50 "clinical information system?".tw.  
51 "clinical data system?".tw.  
52 "information retrieval system?".tw.  
53 "ancillary information system?".tw.  
54 Decision Support Techniques/ [ decision support ]  
55 Decision Support Systems, Clinical/  
56 Decision-Making Computer Assisted/  
57 "computer\$ decision making".tw.  
58 (decision\$ adj2 support\$).tw.  
59 (decision\$ adj2 aid\$).tw.  
60 (decision\$ adj2 tool\$).tw.  
61 (decision\$ adj2 instrument\$).tw.  
62 (decision\$ adj2 technolog\$).tw.  
63 (decision\$ adj2 technique\$).tw.  
64 (decision\$ adj2 system\$).tw.  
65 (decision\$ adj2 program\$).tw.  
66 (decision\$ adj2 algorithm\$).tw.  
67 (decision\$ adj2 process\$).tw.  
68 (decision\$ adj material\$).tw.  
69 (decision\$ adj2 counsel\$).tw.  
70 (decision\$ adj2 guid\$).tw.

71 (decision\$ adj board).tw.  
72 (interacti\$ adj3 tool\$).tw.  
73 "risk communication tool\$".tw.  
74 interprofession\$.tw. [ team changes ]  
75 inter-profession\$.tw.  
76 interdisciplin\$.tw.  
77 inter-disciplin\$.tw.  
78 interoccupation\$.tw.  
79 inter-occupation\$.tw.  
80 interdepartment\$.tw.  
81 inter-department\$.tw.  
82 Interprofessional Relations/  
83 team\$.tw.  
84 multiprofession\$.tw.  
85 multi-profession\$.tw.  
86 multidisciplin\$.tw.  
87 multi-disciplin\$.tw.  
88 multioccupation\$.tw.  
89 multi-occupation\$.tw.  
90 Patient Participation/ [ self management ]  
91 Patient Education as Topic/  
92 Self Care/  
93 (client? adj1 train\$).tw.  
94 (client? adj1 educat\$).tw.  
95 (client? adj1 teach\$).tw.  
96 (client? adj1 instruct\$).tw.  
97 (consumer? adj1 train\$).tw.  
98 (consumer? adj1 educat\$).tw.  
99 (consumer? adj1 teach\$).tw.  
100 (consumer? adj1 instruct\$).tw.  
101 (patient? adj1 train\$).tw.  
102 (patient? adj1 educat\$).tw.  
103 (patient? adj1 teach\$).tw.  
104 (patient? adj1 instruct\$).tw.  
105 self-manag\$.tw.  
106 (self adj manag\$).tw.  
107 self-car\$.tw.

108 (self adj car\$.tw.  
109 self-monitor\$.tw.  
110 (self adj monitor\$.tw.  
111 self-administrat\$.tw.  
112 (self adj administrat\$.tw.  
113 self-medicat\$.tw.  
114 (self adj medicat\$.tw.  
115 Remote Consultation/ [ telemonitoring ]  
116 exp Telemedicine/ and home\$.tw.  
117 exp Telemedicine/ and in-home\$.tw.  
118 Telehealth/ and home\$.tw.  
119 Telehealth/ and in-home\$.tw.  
120 telemonitor\$.tw.  
121 tele-monitor\$.tw.  
122 telehome\$.tw.  
123 tele-home\$.tw.  
124 (home\$ and tele\$.tw.  
125 (in-home\$ and tele\$.tw.  
126 (home\$ and (remote adj2 monitor\$)).tw.  
127 (in-home\$ and (remote adj2 monitor\$)).tw.  
128 (home\$ and (wireless adj2 monitor\$)).tw.  
129 (in-home\$ and (wireless adj2 monitor\$)).tw.  
130 (home\$ and (mobile adj2 monitor\$)).tw.  
131 (in-home\$ and (mobile adj2 monitor\$)).tw.  
132 (home\$ and (cell\$ adj2 monitor\$)).mp.  
133 (in-home\$ and (cell\$ adj2 monitor\$)).mp.  
134 (home\$ and (remote adj2 consult\$)).tw.  
135 (in-home\$ and (remote adj2 consult\$)).tw.  
136 (home\$ and (wireless adj2 consult\$)).tw.  
137 (in-home\$ and (wireless adj2 consult\$)).tw.  
138 (home\$ and (mobile adj2 consult\$)).tw.  
139 (in-home\$ and (mobile adj2 consult\$)).tw.  
140 (home\$ and (cell\$ adj2 consult\$)).mp.  
141 (in-home\$ and (cell\$ adj2 consult\$)).mp.  
142 or/1-141  
143 exp Spinal Cord Injuries/ [ SCI ]  
144 exp Spinal Cord Ischemia/

145 exp Spinal Cord/  
146 exp Central Cord Syndrome/  
147 exp Cervical Vertebrae/in [Injuries]  
148 exp Paraplegia/  
149 exp Quadriplegia/  
150 "central cord injury syndrome?".tw.  
151 "central spinal cord syndrome?".tw.  
152 (myelopathy adj3 traumatic).tw.  
153 (myelopathy adj3 post-traumatic).tw.  
154 paraplegi\$.tw.  
155 quadriplegi\$.tw.  
156 tetraplegi\$.tw.  
157 (spine adj2 fracture\$).tw.  
158 (spine adj2 wound\$).tw.  
159 (spine adj2 trauma\$).tw.  
160 (spine adj2 injur\$).tw.  
161 (spine adj2 damage?).tw.  
162 (spine adj2 lesion\$).tw.  
163 (spinal adj2 fracture\$).tw.  
164 (spinal adj2 wound\$).tw.  
165 (spinal adj2 trauma\$).tw.  
166 (spinal adj2 injur\$).tw.  
167 (spinal adj2 damage?).tw.  
168 (spinal adj2 lesion\$).tw.  
169 ("spinal cord" adj contusion\$).tw.  
170 ("spinal cord" adj laceration\$).tw.  
171 ("spinal cord" adj transaction\$).tw.  
172 ("spinal cord" adj trauma\$).tw.  
173 ("spinal cord" adj ischemia\$).tw.  
174 SCI.tw.  
175 or/143-174  
176 142 and 175  
177 exp Animals/ not (exp Animals/ and Humans/)  
178 176 not 177
